# Supplementary material for: A Capillary Electrophoresis Method Based on Molecularly Imprinted Solid-Phase Extraction for Selective and Sensitive Detection of Histamine in Foods
Source: MDPI journal article supplement (doi:10.3390/molecules27206987), 2022-10-17
Supplement: s1 [file s1]

# A Selective and Sensitive Method for the Detection of Histamine in Foods by Capillary Electrophoresis Coupled with Molecularly Imprinted Solid-Phase Extraction

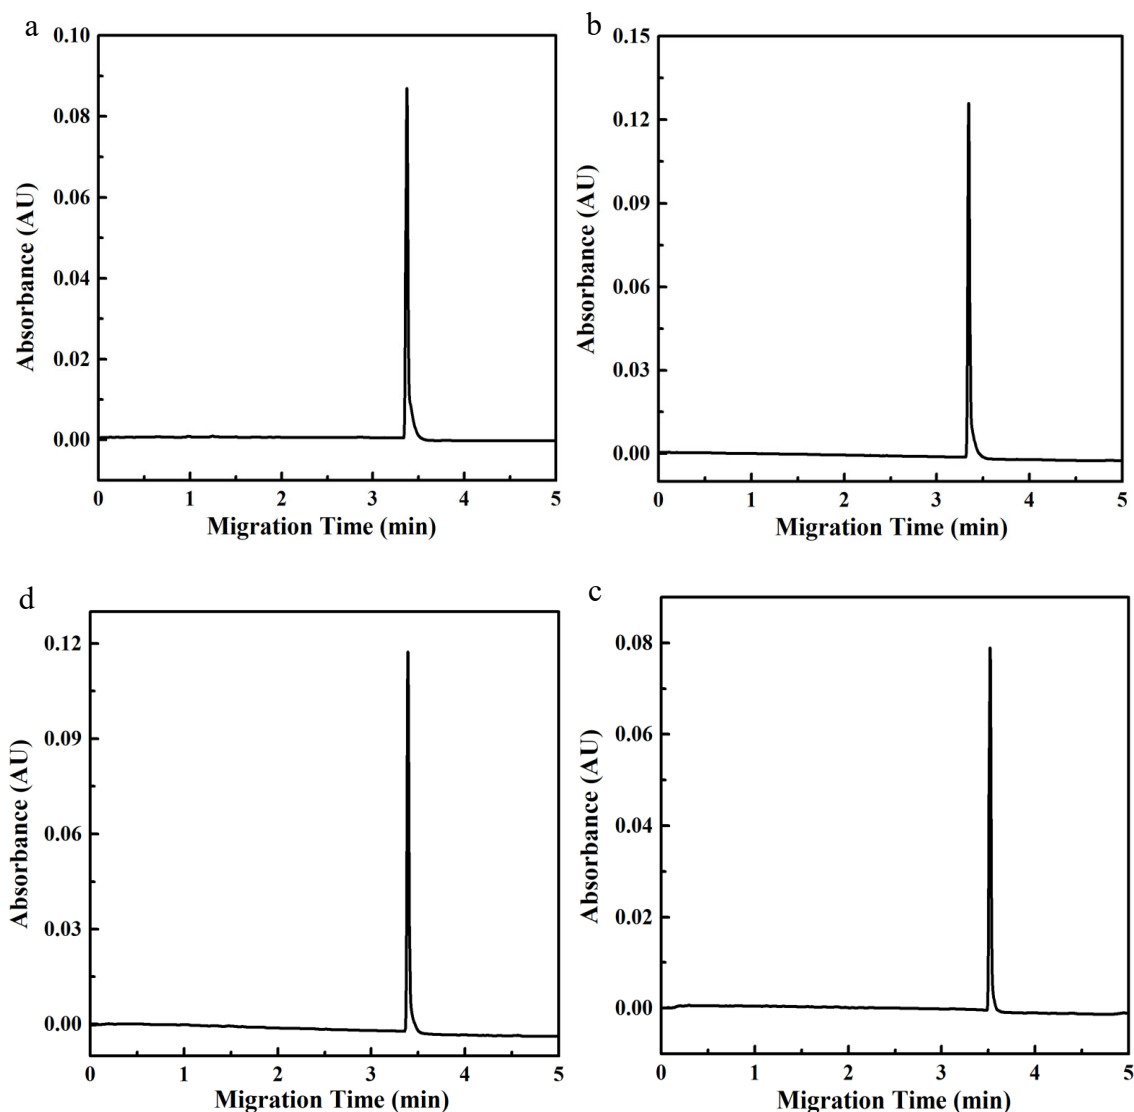

**Figure S1.** The electropherograms of histamine detection in the (a) soy sauce, (b) fish, (c) pork and (d) prawn samples.

**Table S1.** The results of CE and HPLC analysis for histamine detection in the samples (n = 3).

| Samples        | Found Level of MISPE-CE | Found Level of HPLC |
|----------------|-------------------------|---------------------|
|                | (mg/L $\pm$ RSD)        | (mg/L $\pm$ SD)     |
| Fish           | 2.51 $\pm$ 2.30         | 2.50 $\pm$ 0.16     |
| Prawn          | 2.22 $\pm$ 4.40         | 2.24 $\pm$ 0.01     |
| Pork           | 0.51 $\pm$ 0.19         | 0.51 $\pm$ 0.13     |
| Chicken breast | ND <sup>a</sup>         | ND                  |
| Soy sauce      | 1.47 $\pm$ 7.63         | 1.49 $\pm$ 0.10     |

<sup>a</sup> ND: not detected.**Table S2.** Comparison of the developed MISPE-CE method with previous reported methods for the determination of histamine.

| Detector | Method Used                                                              | Linearity ( $\mu$ g/L)                                     | LOD ( $\mu$ g/L)             | Ref.      |
|----------|--------------------------------------------------------------------------|------------------------------------------------------------|------------------------------|-----------|
| DAD      | CE                                                                       | 5.0 $\times$ 10 <sup>3</sup> -2.0 $\times$ 10 <sup>5</sup> | 2.0 $\times$ 10 <sup>3</sup> | [35]      |
| UV       | cITP-CZE-COND                                                            | 22-222                                                     | 4.0                          | [36]      |
| DAD      | CE by field-amplified sample stacking<br>and in-capillary derivatization | 5.6 $\times$ 10 <sup>4</sup> -1.1 $\times$ 10 <sup>8</sup> | 3.7 $\times$ 10 <sup>2</sup> | [37]      |
| UV       | cITP-CZE                                                                 | 2.0 $\times$ 10 <sup>2</sup> -1.0 $\times$ 10 <sup>4</sup> | 3.5 $\times$ 10 <sup>2</sup> | [38]      |
| UV       | CZE                                                                      | 1.0 $\times$ 10 <sup>3</sup> -1.0 $\times$ 10 <sup>5</sup> | 4.8 $\times$ 10 <sup>2</sup> | [39]      |
| DAD      | MISPE                                                                    | 0.1-100.0                                                  | 0.087                        | This work |
